# Supplementary material for: Randomised controlled trial of Advanced Hybrid Closed Loop in an Adult Population with Type 1 Diabetes (ADAPT): study protocol and rationale
Source: PubMed Central journal article supplement — BMJ Open. 2022 Feb 2;12(2):e050635. doi: 10.1136/bmjopen-2021-050635 (PMC8811581; doi:10.1136/bmjopen-2021-050635), 2022-02-02
Supplement: bmjopen-2021-050635supp001.pdf [file bmjopen-2021-050635supp001.pdf]

Supplementary Figure 1 Visit schedule overview

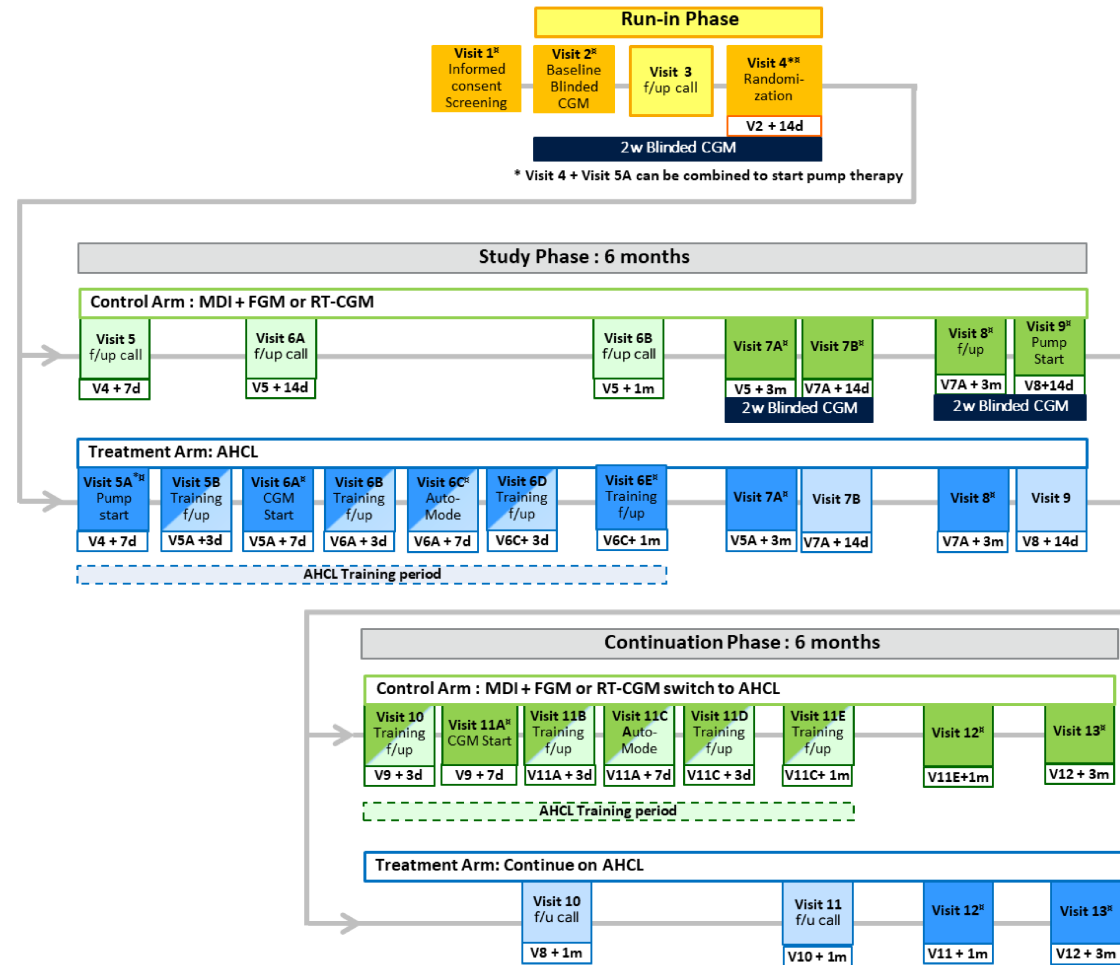

⊗ Visits allowed to be conducted remotely in pandemic period.
