# Supplementary material for: Randomised controlled trial of Advanced Hybrid Closed Loop in an Adult Population with Type 1 Diabetes (ADAPT): study protocol and rationale
Source: PubMed Central journal article supplement — BMJ Open. 2022 Feb 2;12(2):e050635. doi: 10.1136/bmjopen-2021-050635 (PMC8811581; doi:10.1136/bmjopen-2021-050635), 2022-02-02
Supplement: bmjopen-2021-050635supp003.pdf [file bmjopen-2021-050635supp003.pdf]

**ADAPT (CIP327)**  
**Master Informed Consent**

Version 2.0 ; 30 Jul 2020

Page 11 of 13

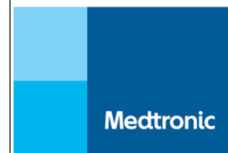

**INFORMED CONSENT FOR THE MEDTRONIC**  
**ADAPT CLINICAL STUDY**  
**SUBJECT INFORMED CONSENT FORM SIGNATURE SHEET**

- I have read the subject information for this study and the study doctor has answered all my questions regarding the study.
- I had sufficient time to consider my participation in this study, I am aware that participation in this study is completely voluntary, and I agree to follow the instructions of the study doctor.
- I realize that I may decide to refuse participation or stop participating at any time without penalty and without affecting the quality of my health care or the relationship with the study doctor.
- I understand and agree that personal information about me will be collected from my medical files, used and processed (manually and by computer) by the manufacturer of a product used in my treatment or any other designated party that is involved in the study (e.g., hospital, study doctor, regulatory authorities, ethics committees).
- I know what will happen if I leave the study and understand the details described in this form.
- I understand and agree that representatives from Medtronic, regulatory authorities and the Ethics Committee will be given direct access to my medical files.
- I understand and agree that the study doctor(s)/hospital will release the relevant personal information about me for the purpose of the study.
- I understand that my personal data may be provided to third-party vendor personnel for the purpose of carrying out home visits and/or supplies shipments and treated with strict confidentiality as detailed in the patient information sheet, if needed during pandemic.
- I understand that I am entitled to access the personal information collected about me and to have inaccuracies corrected.
- I agree to voluntarily be in and comply with this study.
- I understand that I will receive a dated and signed copy of the subject informed consent form.

## ADAPT (CIP327) Master Informed Consent

Version 2.0 ; 30 Jul 2020

Page 12 of 13

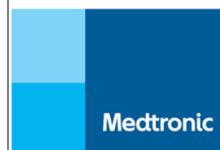

- *This notification can be deleted for countries where personal physicians do not exist*
- *Use if EC requires a checkbox*

It is your choice if you would like your personal doctor to be informed of your participation in this study. Please check one of the boxes below to show your choice:

*! must be checked by subject*

- I agree to inform my personal doctor about my participation in this study
- I do not agree to inform my personal doctor about my participation in the study

### Signature of the subject

**I agree to be in this study and I have consented before the initiation of any study specific procedures.**

**Subject:**

\_\_\_\_\_  
Name

\_\_\_\_\_  
Signature

\_\_\_\_\_  
Date (DD/MMM/YYYY)

*Must be written by subject!*

*Must be written by subject!*

**Study doctor or person designated by study doctor:**

I have conducted the informed consent discussion.

\_\_\_\_\_  
Name

\_\_\_\_\_  
Signature

\_\_\_\_\_  
Date (DD/MMM/YYYY)

*Must be written by study doctor or delegate!*

*Must be written by study doctor or delegate!*
